# Supplementary material for: Evaluation and Identification of Promising Introgression Lines Derived From Wild Cajanus Species for Broadening the Genetic Base of Cultivated Pigeonpea [Cajanus cajan (L.) Millsp.]
Source: Front Plant Sci. 2019 Oct 22;10:1269. doi: 10.3389/fpls.2019.01269 (PMC6817623; doi:10.3389/fpls.2019.01269)
Supplement: Supplementary file 12 [file Table_12.xlsx]

## Sheet: Sheet1
Supplementary Table 6b. Table of first four AMMI selections per environment for MET 01 during the 2016 rainy season.
Environment	Mean	Score	1	2	3	4
Patancheru	41.68	0.823	ICPL 15085	ICPL 15019	ICPL 15071	ICPL 15062
Kalaburagi	68.34	-5.143	ICPL 15075	ICPL 15071	ICPL 15042	ICPL 15019
Warangal	41.37	0.191	ICPL 15019	ICPL 15071	ICPL 15085	ICPL 15065
Tirupati	49.08	4.129	ICPL 15062	ICPL 15085	ICPL 15075	ICPL 15060
